# Supplementary material for: The Chemical Signatures of Water Extract of Zingiber officinale Rosc
Source: MDPI journal article supplement (doi:10.3390/molecules27227818), 2022-11-13
Supplement: s1 [file s1]

### Supplementary Material

**Supplement Table S1.** Data of chemical substances database of *Zingiber officinale* Rosc.

| Formula  | Mass   | Name                                  |
|----------|--------|---------------------------------------|
| C7H16O   | 116.12 | 2-Heptanol                            |
| C6H13NO2 | 131.09 | Isoleucine                            |
| C5H11NO3 | 133.07 | Mesotrihydroxypiperidine              |
| C10H14   | 134.11 | p-Cymene                              |
| C10H16   | 136.13 | alpha-Limonene                        |
| C10H16   | 136.13 | beta-Phellandrene                     |
| C10H16   | 136.13 | camphene                              |
| C10H16   | 136.13 | D-Limonene                            |
| C10H16   | 136.13 | alpha-Pinene                          |
| C10H16   | 136.13 | Camphene                              |
| C10H16   | 136.13 | 1R,5R-(+)-alpha-Pinene                |
| C10H16   | 136.13 | Terpinolene                           |
| C10H16   | 136.13 | 4(10)-Thujene                         |
| C10H16   | 136.13 | beta-Pinene                           |
| C7H5O3   | 137.02 | Salicylic acid                        |
| C9H18O   | 142.14 | 2-Nonanone                            |
| C9H18O   | 142.14 | Nonaldehyde                           |
| C10H22   | 142.17 | Decane                                |
| C9H20O   | 144.15 | 2-Nonanol                             |
| C5H11NS2 | 149.03 | Nereistoxin                           |
| C8H9NO2  | 151.06 | 2-(methylamino)benzoic acid           |
| C10H16O  | 152.12 | (Z)-Citral                            |
| C10H16O  | 152.12 | Citral                                |
| C10H16O  | 152.12 | (-)-Camphor                           |
| C10H16O  | 152.12 | (E)-Citral                            |
| C10H18O  | 154.14 | alpha-Linalool                        |
| C10H18O  | 154.14 | 1,8-Cineole                           |
| C10H18O  | 154.14 | Geraniol                              |
| C10H20O  | 156.15 | Decanal                               |
| C9H8NO2  | 162.06 | Homovanillonitrile                    |
| C9H7O3   | 163.04 | p-Coumaric acid                       |
| C6H11O5  | 163.06 | 2-Deoxy-D-glucose                     |
| C9H11NO2 | 165.08 | phenylalanine                         |
| C11H22O  | 170.17 | 2-Undecanone                          |
| C10H9O3  | 177.06 | 3-Buten-2-on, 4-(2,5-dihydroxyphenyl) |
| C6H11O6  | 179.06 | glucose                               |
| C6H7O7   | 191.02 | Citric acid                           |
| C11H14O3 | 194.09 | zingerone                             |
| C10H11O4 | 195.07 | Dihydroferulic acid                   |
| C12H20O2 | 196.15 | Geranyl acetate                       |
| C15H22   | 202.17 | Curcumene                             |
| C11H7O4  | 203.03 | 7-Methoxycoumarin-6-aldehyde          |

|            |        |                                                                                                   |
|------------|--------|---------------------------------------------------------------------------------------------------|
| C14H21N    | 203.17 | 2,6-Nonamethylene pyridine                                                                        |
| C11H12N2O2 | 204.09 | Tryptophan                                                                                        |
| C15H24     | 204.19 | beta-Bisabolene                                                                                   |
| C15H24     | 204.19 | beta-Curcumene                                                                                    |
| C15H24     | 204.19 | beta-Farnesene                                                                                    |
| C15H24     | 204.19 | Zingiberene                                                                                       |
| C15H24     | 204.19 | Farnesene                                                                                         |
| C15H24     | 204.19 | Bisabolene                                                                                        |
| C15H24     | 204.19 | (E,E)-alpha-Farnesene                                                                             |
| C15H24     | 204.19 | Cedr-8-ene                                                                                        |
| C15H24     | 204.19 | (-)-Germacrene D                                                                                  |
| C15H24     | 204.19 | (+)-Cyclosativene                                                                                 |
| C14H21O    | 205.16 | Benzenepentanol, $\alpha,\alpha,4$ -trimethyl                                                     |
| C16H26     | 218.2  | beta-Sesquiphellandrene                                                                           |
| C14H20O2   | 220.15 | (+)-1,5-Epoxy-nor-ketoguaia-11-ene                                                                |
| C15H24O    | 220.18 | Shyobunone                                                                                        |
| C15H24O    | 220.18 | Zingiberone                                                                                       |
| C13H17O3   | 221.12 | Paradol                                                                                           |
| C14H21O2   | 221.15 | Kobusone                                                                                          |
| C15H26O    | 222.2  | Campherenol                                                                                       |
| C14H29NO   | 227.22 | Halaminol A                                                                                       |
| C15H26O2   | 238.19 | Curcumadiol                                                                                       |
| C16H22O2   | 246.16 | Demethoxy-[6]-shogaol                                                                             |
| C15H20O3   | 248.14 | [4]-Shogaol                                                                                       |
| C16H24O2   | 248.18 | 3-Dihydro-[6]-demethoxyshogaol                                                                    |
| C16H31NO   | 253.24 | Palmitoleamide                                                                                    |
| C16H32O2   | 256.24 | Palmitic acid                                                                                     |
| C16H22O3   | 262.16 | Methy-[4]-shogaol                                                                                 |
| C16H24O3   | 264.17 | Demethoxy-[6]-gingerol                                                                            |
| C15H22O4   | 266.15 | [4]-Gingerol                                                                                      |
| C15H24O4   | 268.17 | [4]-Gingerdiol                                                                                    |
| C15H10O5   | 270.05 | Galangin                                                                                          |
| C17H34O2   | 270.26 | Methyl hexadecanate                                                                               |
| C17H24O3   | 276.17 | [6]-Shogaol                                                                                       |
| C17H26O3   | 278.19 | [6]-Paradol                                                                                       |
| C18H17NO2  | 279.13 | Hptaphylline                                                                                      |
| C16H24O4   | 280.17 | Methyl-[4]-gingerol                                                                               |
| C17H28O3   | 280.2  | Dihydro-[6]-paradol                                                                               |
| C16H25O4   | 281.18 | 1,2-benzendiol derivative 3(5-(3,5-bis(acetoxyl)-7-(4-hydroxy-3-methoxyphenyl)heptyl)-3-methoxy-) |
| C18H35NO   | 281.27 | Oleamide                                                                                          |
| C17H22O4   | 290.15 | Methyl-[6]-shogaol                                                                                |
| C17H22O4   | 290.15 | dehydro-6-gingerdione                                                                             |
| C18H26O3   | 290.19 | 1-Dehydro-[6]-gingerdione                                                                         |
| C17H24O4   | 292.17 | 6-Dehydro-[6]-gingerol                                                                            |
| C17H24O4   | 292.17 | [6]-Gingerdione                                                                                   |

|            |        |                                                                         |
|------------|--------|-------------------------------------------------------------------------|
| C17H24O4   | 292.17 | 1-Dehydro-[6]-gingerol                                                  |
| C17H24O4   | 292.17 | 6-Hydroxy-[6]-shogaol                                                   |
| C17H24O4   | 292.17 | dehydro-6-gingerol                                                      |
| C18H28O3   | 292.2  | [7]-Paradol                                                             |
| C17H26O4   | 294.18 | [6]-Gingerol                                                            |
| C17H28O4   | 296.2  | [6]-Gingerdiol                                                          |
| C13H20N3O5 | 298.14 | L-arabino-hept-2-enar-7-amic acid derivative                            |
| C18H34O3   | 298.25 | Oxo-octadecenoic acid                                                   |
| C18H37NO2  | 299.28 | Amino-octadecene-diol                                                   |
| C15H10O7   | 302.04 | pentahydroxyflavone                                                     |
| C19H28O3   | 304.2  | [8]-Shogaol                                                             |
| C19H30O3   | 306.22 | [8]-Paradol                                                             |
| C17H24O5   | 308.16 | Acetoxy-[4]-gingerol                                                    |
| C18H28O4   | 308.2  | Methyl-[6]-gingerol                                                     |
| C18H28O4   | 308.2  | Me-6-gingerol                                                           |
| C20H36O2   | 308.27 | Labdene-diol                                                            |
| C17H26O5   | 310.18 | 3-Acetoxy-[4]-gingerdione                                               |
| C16H12O7   | 316.06 | Sexangularetin                                                          |
| C19H26O4   | 318.18 | 1-Dehydro-[8]-gingerdione                                               |
| C20H30O3   | 318.22 | Methyl-[8]-shogaol                                                      |
| C20H30O3   | 318.22 | (E)-8,17-Epoxyabd-12-ene-15,16-dial                                     |
| C19H28O4   | 320.2  | [8]-Gingerdione                                                         |
| C19H28O4   | 320.2  | 6-Hydroxy-[8]-shogaol                                                   |
| C19H28O4   | 320.2  | dehydro-8-gingerol                                                      |
| C20H32O3   | 320.24 | [9]-Paradol                                                             |
| C19H30O4   | 322.21 | (S)-8-Gingerol                                                          |
| C19H32O4   | 324.23 | [8]-Gingerdiol                                                          |
| C20H22O4   | 326.15 | Gingerenone C                                                           |
| C18H33O5   | 329.23 | Octadecenoic acid, -trihydroxy                                          |
| C18H34O5   | 330.24 | trihydroxy octadecenoic acid                                            |
| C21H32O3   | 332.24 | 10-Shogaol                                                              |
| C19H26O5   | 334.18 | dehydro-8-gingerdione                                                   |
| C21H34O3   | 334.25 | [10]-Paradol                                                            |
| C19H28O5   | 336.19 | Acetoxy-[6]-gingerol                                                    |
| C20H32O4   | 336.23 | Methyl-[8]-gingerol                                                     |
| C20H32O4   | 336.23 | Me-8-gingerol                                                           |
| C19H30O5   | 338.21 | 3-Acetoxy-[6]-gingerdione                                               |
| C20H22O5   | 342.15 | 1-(4-hydroxy-3-methoxyphenyl)-7-(3,4-dihydroxyphenyl)heptanone          |
| C20H24O5   | 344.16 | 5-Hydroxy-1-(4-hydroxy-3-methoxyphenyl)-7-(4-hydroxyphenyl)-3-heptanone |
| C20H25O5   | 345.17 | Rosmanol                                                                |
| C21H30O4   | 346.21 | 1-Dehydro-[10]-gingerdione                                              |
| C21H30O4   | 346.21 | dehydro-10-gingerdione                                                  |
| C21H32O4   | 348.23 | e1 - Dehydro-3-dihydro-[10]-gingerdione                                 |
| C21H32O4   | 348.23 | [10]-Gingerdione                                                        |

|           |        |                                                                                                    |
|-----------|--------|----------------------------------------------------------------------------------------------------|
| C21H32O4  | 348.23 | 6-Hydroxy-[10]-shogaol                                                                             |
| C21H32O4  | 348.23 | dehydro-10-gingerol                                                                                |
| C20H30O5  | 350.21 | Methyl acetoxyl-[6]-gingerol                                                                       |
| C21H34O4  | 350.25 | [10]-Gingerol                                                                                      |
| C19H28O6  | 352.19 | Diacetoxyl-[4]-gingerdial                                                                          |
| C20H32O5  | 352.23 | Methyl-3-acetoxyl-[6]-gingerdial                                                                   |
| C21H36O4  | 352.26 | [10]-Gingerdial                                                                                    |
| C21H24O5  | 356.16 | 1,7bis-(4-Hydroxy-3-methoxyphenyl)-4-heptanone                                                     |
| C21H24O5  | 356.16 | Gingerenone A                                                                                      |
| C21H24O5  | 356.16 | Gingerenone A                                                                                      |
| C21H28O5  | 360.19 | Cinerins                                                                                           |
| C23H36O3  | 360.27 | [12]-Shogaol                                                                                       |
| C21H32O5  | 364.23 | Acetoxyl-[8]-gingerol                                                                              |
| C22H36O4  | 364.26 | Methyl-[10]-gingerol                                                                               |
| C21H17O6  | 365.1  | Diarylheptanoid                                                                                    |
| C20H30O6  | 366.2  | Methyl diacetoxyl-[4]-gingerdial                                                                   |
| C17H19O9  | 367.1  | Feruloylquinic acid                                                                                |
| C21H22O6  | 370.14 | Dihydrocurcumin                                                                                    |
| C21H24O6  | 372.16 | 1,7bis-(4-Hydroxy-3-methoxyphenyl)-3,5-heptadione                                                  |
| C21H24O6  | 372.16 | Tetrahydrocurcumin                                                                                 |
| C21H26O6  | 374.17 | 5-Hydroxy-1,7-bis(4-hydroxy-3-methoxyphenyl)-3-heptanone                                           |
| C21H26O6  | 374.17 | 3,5-diHydroxy-1,7-bis(4-hydroxy-3-methoxyphenyl)-3-heptanone                                       |
| C21H26O6  | 374.17 | 3-Acetoxyl-5-hydroxy-1-(4-hydroxyphenyl)-7-(3,4-dihydroxyphenyl)heptane                            |
| C21H26O6  | 374.17 | hexahydrocurcumin                                                                                  |
| C23H34O4  | 374.25 | 1-Dehydro-[12]-gingerdione                                                                         |
| C23H34O4  | 374.25 | dehydro-12-gingerdione                                                                             |
| C21H27O6  | 375.18 | Octahydrocurcumin                                                                                  |
| C23H36O4  | 376.26 | 3,5-diHydroxy-1,7-bis(4-hydroxy-3-methoxyphenyl)heptane                                            |
| C23H36O4  | 376.26 | [12]-Gingerdione                                                                                   |
| C23H36O4  | 376.26 | dehydro-12-gingerol                                                                                |
| C23H38O4  | 378.28 | [12]-Gingerol                                                                                      |
| C21H32O6  | 380.22 | Diacetoxyl-[6]-gingerdial                                                                          |
| C14H23O12 | 383.12 | Sucrose 6-acetate                                                                                  |
| C22H26O6  | 386.17 | 1-(4-Hydroxy-3,5-dimethoxyphenyl)-7-(4-hydroxy-3-methoxyphenyl)-heptanone                          |
| C22H26O6  | 386.17 | Gingerenone B                                                                                      |
| C22H28O6  | 388.19 | 1,7bis-(4-Hydroxy-3-methoxyphenyl)-5-methoxy-3-heptanone                                           |
| C19H32O8  | 388.21 | 12,13-Di-acetoxyl-1,4,6,11-eudesmanetetol                                                          |
| C21H25O7  | 389.16 | 3-Heptanone derivative(1-(3,4-dihydroxy-5-methoxyphenyl)-5-hydroxy-7-(4-hydroxy-3-methoxyphenyl)-) |
| C21H26O7  | 390.17 | 5-Hydroxy-1-(3,4-dihydroxy-5-methoxyphenyl)-7-(4-hydroxy-3-methoxyphenyl)-3-heptanone              |
| C21H26O7  | 390.17 | 3-Acetoxyl-5-hydroxy-1,7-bis(3,4-dihydroxyphenyl)heptane                                           |
| C21H26O7  | 390.17 | 1,5-Epoxy-3-hydroxy-1-(3,4-dihydroxy-5-methoxyphenyl)-7-(4-hydroxy-3-methoxyphenyl)heptane         |

|            |        |                                                                                                       |
|------------|--------|-------------------------------------------------------------------------------------------------------|
| C23H36O5   | 392.26 | Acetoxy-[10]-gingerol                                                                                 |
| C18H12N5O6 | 394.08 | DPPH                                                                                                  |
| C22H34O6   | 394.24 | Methyl-diacetoxy-[6]-gingerdiol                                                                       |
| C15H25O12  | 397.13 | d-Glucopyranoside 2                                                                                   |
| C25H38O4   | 402.28 | dehydro-14-gingerdione                                                                                |
| C22H28O7   | 404.18 | 5-Hydroxy-1-(4-hydroxy-3,5-dimethoxyphenyl)-7-(4-hydroxy-3-methoxyphenyl)-3-heptanone                 |
| C22H28O7   | 404.18 | 3-Acetoxy-5-hydroxy-1-(4-hydroxy-3-methoxyphenyl)-7-(3,4-dihydroxyphenyl)heptane                      |
| C22H28O7   | 404.18 | 1,5-Epoxy-3-hydroxy-1-(4-hydroxy-3,5-dimethoxyphenyl)-7-(4-hydroxy-4-methoxyphenyl)heptane            |
| C22H28O7   | 404.18 | 5?-Hydroxy-1-(4-hydroxy-3,5-dimethoxyphenyl)-7-(4-hydroxy-3-methoxyphenyl)-3-heptanone                |
| C22H29O7   | 405.19 | 3,5-heptanediol derivative 1(1-(4-hydroxy-3,5-dimethoxyphenyl)-7-(4-hydroxy-3-methoxyphenyl)-)        |
| C22H30O7   | 406.2  | 3,5-dihydroxy-1-(4-hydroxy-3,5-dimethoxyphenyl)-7-(4-hydroxy-3-methoxyphenyl)heptane                  |
| C23H36O6   | 408.25 | Diacetoxy-[8]-gingerdiol                                                                              |
| C23H28O7   | 416.18 | 3,5-Diacetoxy-1-(3,4-dihydroxyphenyl)-7(4-hydroxyphenyl)heptane                                       |
| C23H30O7   | 418.2  | 3-Acetoxy-5-hydroxy-1,7-bis(4-hydroxy-3-methoxyphenyl)heptane                                         |
| C22H28O8   | 420.18 | 3-Acetoxy-5-hydroxy-1-(3,4-dihydroxyphenyl)-7-(3,4-dihydroxy-5-methoxyphenyl)heptane                  |
| C24H38O6   | 422.27 | Methyl diacetoxy-[8]-gingerdiol                                                                       |
| C24H29O7   | 429.19 | 3,5-heptanediol derivative 1(1-(4-hydroxy-3-methoxyphenyl)-7-(4-hydroxyphenyl)-)                      |
| C24H30O7   | 430.2  | 3,5-Diacetoxy-1-(4-hydroxy-3-methoxyphenyl)-7-(4-hydroxyphenyl)heptane                                |
| C23H28O8   | 432.18 | 3,5-Diacetoxy-1,7-bis(3,4-dihydroxyphenyl)heptane                                                     |
| C23H28O8   | 432.18 | 3-Acetoxy-1,5-epoxy-1-(3,4-dihydroxy-5-methoxyphenyl)-7-(4-hydroxy-3-methoxyphenyl)heptane            |
| C27H28O5   | 432.19 | Galanganol C                                                                                          |
| C30H40O2   | 432.3  | Citraurin beta                                                                                        |
| C23H29O8   | 433.19 | 1,2-benzendiol derivative 1(5-(5-(acetoxyl)-3-hydroxy-7-(4-hydroxy-3-methoxyphenyl)heptyl)-3methoxy-) |
| C23H30O8   | 434.19 | 3-Acetoxy-5-hydroxy-1-(3,4-dihydroxy-5-methoxyphenyl)-7-(4-hydroxy-3-methoxyphenyl)heptane            |
| C23H32O8   | 436.21 | 3,5-diHydroxy-1,7-bis(4-hydroxy-3,5-dimethoxyphenyl)heptane                                           |
| C25H40O6   | 436.28 | Diacetoxy-[10]-gingerdiol                                                                             |
| C24H29O8   | 445.19 | 2H-Pyran-4-ol derivative(tetrahydro-2-(4-hydroxy-3,5-dimethoxyphenyl)-)                               |
| C24H30O8   | 446.19 | 3,5-Diacetoxy-1-(3,4-dihydroxyphenyl)-7-(4-hydroxy-3-methoxyphenyl)heptane                            |
| C24H32O8   | 448.21 | 3-Acetoxy-5-hydroxy-1-(4-hydroxy-3-methoxyphenyl)-7-(4-hydroxy-3,5-dimethoxyphenyl)                   |
| C24H32O8   | 448.21 | 3-Acetoxy-5-hydroxy-1-(3,4-dihydroxy-5-methoxyphenyl)heptane                                          |

|              |        |                                                                                                   |
|--------------|--------|---------------------------------------------------------------------------------------------------|
| C23H30O9     | 450.19 | 3-Acetoxy-5-hydroxy-1,7-bis(3,4-dihydroxy-5-methoxyphenyl)heptane                                 |
| C26H42O6     | 450.3  | Methyl diacetoxy-[10]-gingerdiol                                                                  |
| C27H36O6     | 456.25 | Meso-3,5-diacetoxy-1,7-bis-(4-hydroxy-3-methoxyphenyl)heptane                                     |
| C25H32O8     | 460.21 | 3,5-Diacetoxy-1,7-bis(4-hydroxy-3-methoxyphenyl)heptane                                           |
| C24H29O9     | 461.18 | 1,2-benzendiol derivative 2(5-(3,5-bis(acetoxyl)-7-(3,4-dihydroxyphenyl)heptyl)-3-methoxy-)       |
| C24H30O9     | 462.19 | 3,5-Diacetoxy-1-(3,4-dihydroxyphenyl)-7-(3,4-dihydroxy-5-methoxyphenyl)heptane                    |
| C25H31O9     | 475.2  | 1,2-benzendiol derivative 4(5-(3,5-bis(acetoxyl)-7-(4-hydroxy-3-methoxyphenyl)heptyl)-3-methoxy-) |
| C25H32O9     | 476.2  | 3,5-Diacetoxy-1-(4-hydroxy-3-methoxyphenyl)-7-(3,4-dihydroxy-5-methoxyphenyl)heptane              |
| C18H29O15    | 485.15 | d-Fructofuranose                                                                                  |
| C26H34O9     | 490.22 | 3,5-Diacetoxy-1-(4-hydroxy-3,5-dimethoxyphenyl)-7-(4-hydroxy-3-methoxyphenyl)heptane              |
| C25H32O10    | 492.2  | 3,5-Diacetoxy-1,7-bis(3,4-dihydroxy-5-methoxyphenyl)heptane                                       |
| C21H40NO12   | 498.26 | d-Glucopyranoside 2                                                                               |
| C26H34O10    | 506.22 | 3,5-Diacetoxy-1-(3,4-dihydroxy-5-methoxyphenyl)-7-(4-hydroxy-3,5-dimethoxyphenyl)heptane          |
| C25H24O12    | 516.13 | Diacetylafzelin                                                                                   |
| C18H24N6O6S4 | 548.06 | ABTS                                                                                              |
| C26H28O13    | 548.15 | Hemsleyanoside                                                                                    |
| C22H40NO15   | 558.24 | d-Glucopyranoside 3                                                                               |
| C21H35O 17   | 559.19 | d-Arabinofuranoside                                                                               |
| C26H28O14    | 564.15 | Kaempferol rhamnoside xyloside                                                                    |
| C32H22O10    | 566.12 | Ginketin                                                                                          |
| C27H30O16    | 610.15 | kaempferol diglucoside                                                                            |
| C27H30O16    | 610.15 | Rutin                                                                                             |
| C30H27O14    | 611.14 | Delphinidin coumaroyl glucoside/Delphinidin-3-O-(6-p-coumaroyl)glucoside                          |
| C24H35O18    | 611.18 | L-Glycero-manno-heptopyranose                                                                     |
| C25H31N4O14  | 611.18 | A-arabitol derivative                                                                             |
| C24H39O20    | 647.2  | d-Glucopyranoside 1                                                                               |
| C33H58O14    | 678.38 | Gingerglycolipid A/B                                                                              |
| C32H44N7O10  | 686.32 | Peptide 1                                                                                         |
| C27H45O22    | 721.24 | d-Glucopyranoside 1                                                                               |
| C34H47N8O10  | 727.34 | Protein 1                                                                                         |
| C35H43N12O6  | 727.34 | Alaninamid derivative(N-(4-(((2,4-diamino-6-pteridiny)methyl)methylamino)benzoyl)-l-?-glutamyl-)  |
| C45H72O17    | 884.48 | Zingiberoside A3                                                                                  |
| C41H28O27    | 952.08 | Geraniin                                                                                          |
| C55H88O21    | 1084.6 | Cynanuriculoside A                                                                                |
